# Supplementary material
Source: PubMed Central journal article supplement (PMC8130178)
Supplement: media-1.pdf [file media-1.pdf]

Fig. S1

A

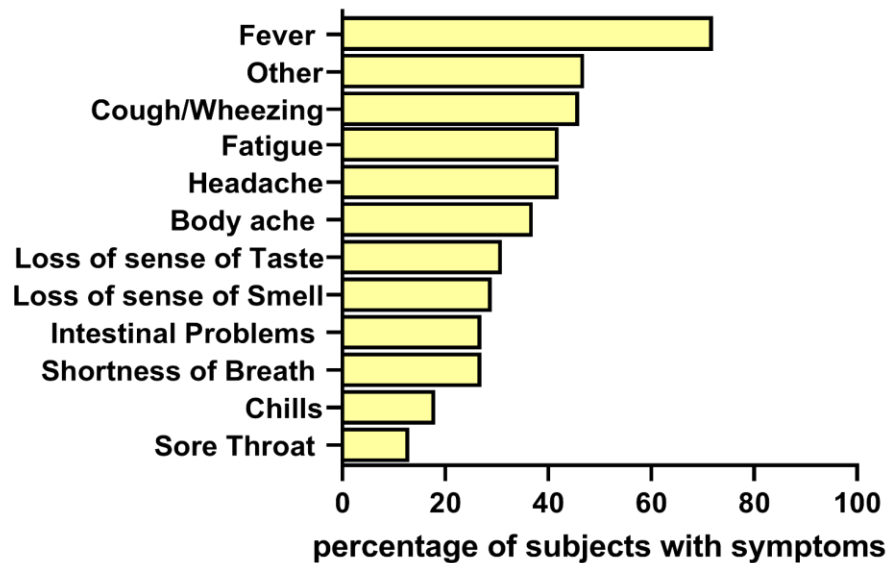

B

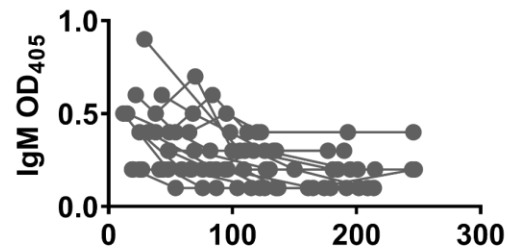

C

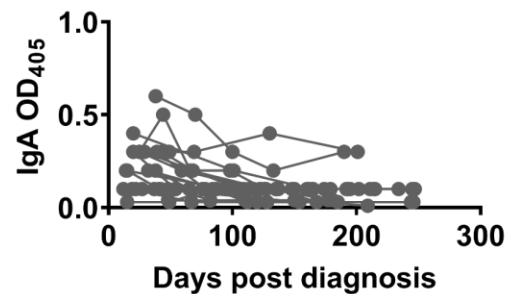

D

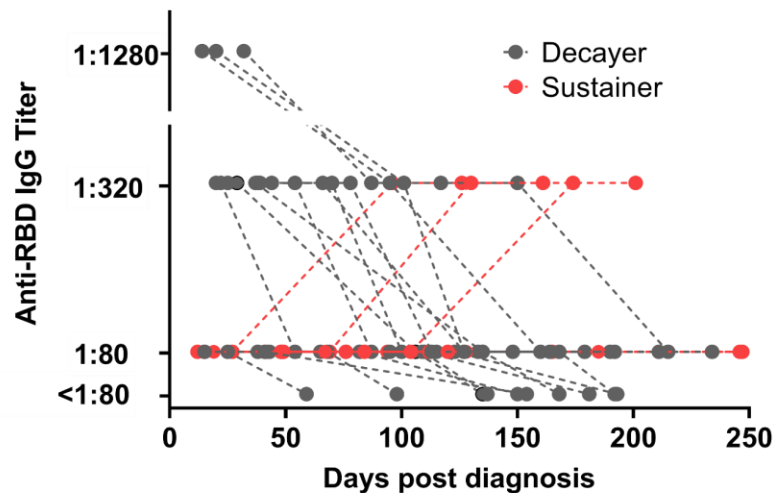

E

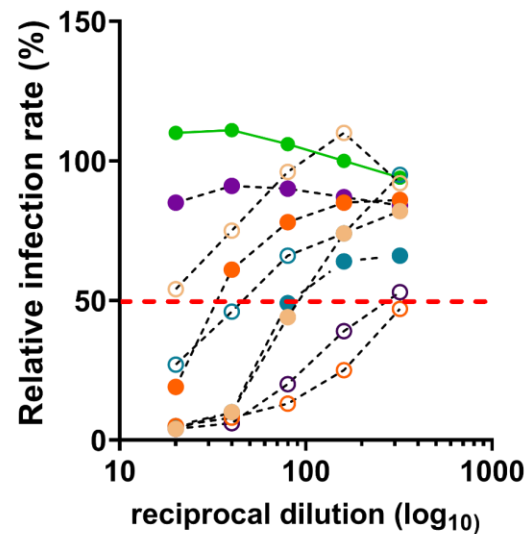

F

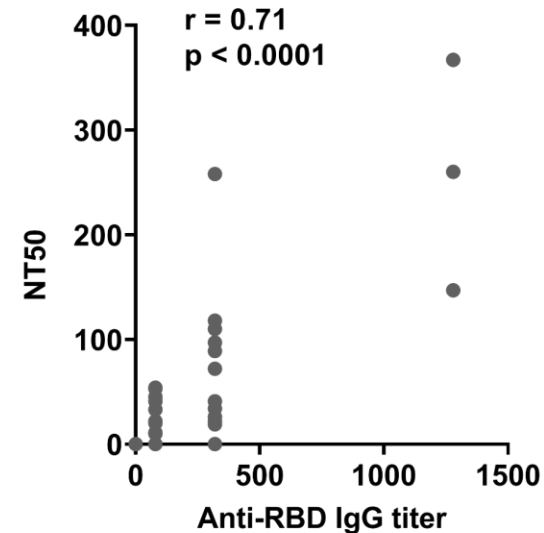

**Supplementary Fig. 1. (A) Frequency of symptoms related to SARS-CoV-2 infection in study subjects (n = 83).** Each row represents a (type of) clinical symptom(s) and shows the percentage of study subjects who self-reported that symptom(s). **(B,C) Anti-RBD levels of IgM and IgA antibodies.** Line graphs showing IgM and IgA antibody levels in the same subjects as in main **Fig 2B**. **(D) Titers of circulating anti-RBD IgG.** Trajectories of RBD-specific IgG antibody titers corresponding to the OD<sub>405</sub> data in main **Fig. 1A**. Study subjects and definition of sustainers and decayers as per **Fig. 1B**. **(E) Method for neutralizing titer 50 (NT50) determination.** Representative neutralization curves demonstrating the determination of 50% neutralization (red dotted line) for the calculation of NT50 values presented in main **Fig. 1C** and main **Fig. 2C,D**. Relative infection rates were obtained by dividing the fluorescence readings (derived from fluorescently tagged virus) of the sample-treated wells by the un-treated control wells (infection rates above 100% result from small biological variations in untreated wells, and indicate no neutralization). The light green line corresponds to an uninfected (negative control) sample exhibiting no neutralizing activity. **(F) Correlation between anti-RBD titer and NT50.** Correlation analysis between anti-RBD IgG endpoint titers (x-axis) and neutralizing titers (y-axis) (n = 44). The Spearman's correlation coefficient  $r$  and corresponding  $p$  value were calculated.

Fig. S2

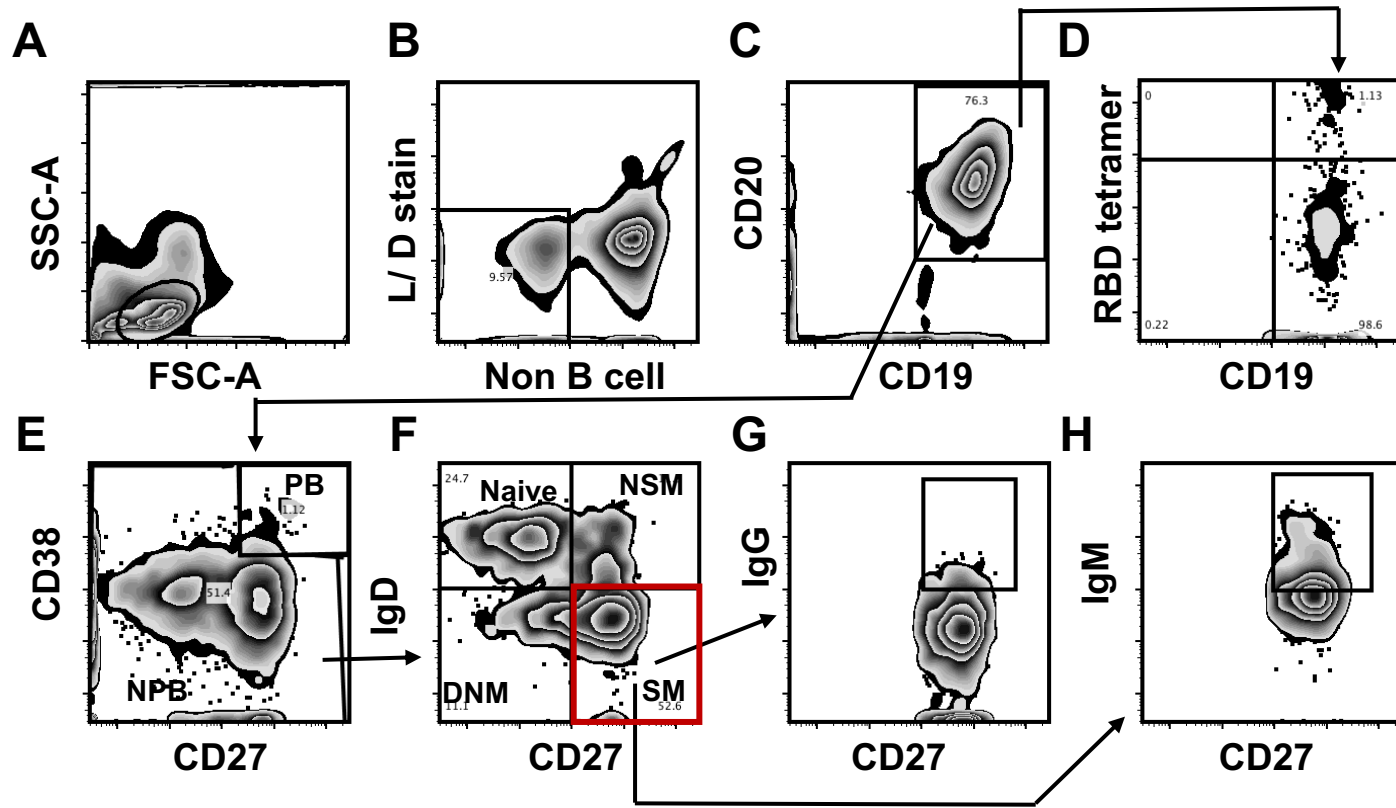

**Supplementary Fig. 2. Flow cytometry gating strategy for B cell subsets. (A)**

Physical parameters. **(B)** Exclusion of dead cells and non-B cells (CD14<sup>+</sup>, CD3<sup>+</sup>, CD4<sup>+</sup>,

CD56<sup>+</sup>). **(C)** CD19<sup>+</sup>CD20<sup>+</sup> cells (B cells) were further gated to distinguish **(D)** RBD-

specific B cells utilizing fluorescently labeled RBD tetramers. **(E)** Plasmablast

(CD27<sup>+</sup>CD38<sup>hi</sup>) and non plasmablasts. **(F)** Non-plasmablasts were further gated on

CD27 and IgD for memory phenotyping: Naïve B cells (CD27<sup>-</sup>IgD<sup>+</sup>), Non switched

memory B cells (NSM; CD27<sup>+</sup>IgD<sup>+</sup>), Switched memory B cells (SM; CD27<sup>+</sup>IgD<sup>-</sup>), and

Double negative memory B cell (DNM; CD27<sup>-</sup>IgD<sup>-</sup>). Switched memory (SM) cell were

further gated to determine the frequencies of **(G)** IgG<sup>+</sup> switched memory B cell (IgG<sup>+</sup>SM)

and **(H)** and IgM<sup>+</sup> switched memory B cell (IgM<sup>+</sup>SM).

**Table S1. Characteristics of study participants**

| <b>Characteristics</b>                                                  | <b>n=83</b>        |
|-------------------------------------------------------------------------|--------------------|
| Age (years), median (IQR*)                                              | 45 (31-56)         |
| Gender, n (%)                                                           |                    |
| Male                                                                    | 38 (46)            |
| Female                                                                  | 45 (54)            |
| Race, n (%)                                                             |                    |
| African American or Black                                               | 6 (7)              |
| Alaskan Native of American Indian                                       | 0 (0)              |
| Asian or Pacific Islander                                               | 13 (16)            |
| White                                                                   | 63 (76)            |
| Other                                                                   | 1 (1)              |
| Ethnicity, n (%)                                                        |                    |
| Hispanic or Latino                                                      | 16 (19)            |
| Non-Hispanic                                                            | 67 (81)            |
| SARS-CoV-2 PCR Positivity, n (%)                                        |                    |
| Positive                                                                | 81 (98)            |
| Negative                                                                | 0 (0)              |
| Not performed**                                                         | 2 (2)              |
| Peak Disease Severity, n (%) [Female (F), Male (M)]                     |                    |
| Asymptomatic                                                            | 1 (1) [0F, 1M]     |
| Mild (Non-hospitalized; 1-4 symptoms)                                   | 55 (66) [30F, 25M] |
| Moderate (Non-hospitalized; 5 or more symptoms)                         | 22 (27) [16F, 6M]  |
| Severe (Hospitalized)                                                   | 5 (6) [2F, 3M]     |
| Days After Symptom Onset at Initial Collection (n=82***), median (IQR*) | 34 (26-42)         |

\*Interquartile range.

\*\*Subjects who did not receive the PCR test were diagnosed by exposure history (PCR-positive household members), COVID-19 symptoms, and positive chest x-ray findings.

\*\*\*The asymptomatic subject was not included.

**Table S2. Characteristics of study subjects followed longitudinally**

| <b>Characteristics</b>                                                  | <b>n=23</b>      |
|-------------------------------------------------------------------------|------------------|
| Age (years), median (IQR*)                                              | 39 (31-56)       |
| Gender, n (%)                                                           |                  |
| Male                                                                    | 9 (39)           |
| Female                                                                  | 14 (61)          |
| Race, n (%)                                                             |                  |
| African American or Black                                               | 2 (9)            |
| Alaskan Native of American Indian                                       | 0 (0)            |
| Asian or Pacific Islander                                               | 3 (13)           |
| White                                                                   | 18 (78)          |
| Ethnicity, n (%)                                                        |                  |
| Hispanic or Latino                                                      | 6 (26)           |
| Non-Hispanic                                                            | 17 (74)          |
| SARS-CoV-2 PCR Positivity, n (%)                                        |                  |
| Positive                                                                | 21 (91)          |
| Negative                                                                | 0 (0)            |
| Not performed**                                                         | 2 (9)            |
| Peak Disease Severity, n (%) [Female (F), Male (M)]                     |                  |
| Asymptomatic                                                            | 1 (4) [0F, 1M]   |
| Mild (Non-hospitalized; 1-4 symptoms)                                   | 15 (65) [6F, 9M] |
| Moderate (Non-hospitalized; 5 or more symptoms)                         | 7 (31) [5F, 2M]  |
| Severe (Hospitalized)                                                   | 0 (0) [0F, 0M]   |
| Days After Symptom Onset at Initial Collection (n=22***), median (IQR*) | 38.5 (26-42)     |

\*Interquartile range.

\*\*Subjects who did not receive the PCR test were diagnosed by exposure history (PCR-positive household members), COVID-19 symptoms, and positive chest x-ray findings.

\*\*\*The asymptomatic subject was not included.

**Table S3. Comparison of cell subsets in non-infected and infected subjects**

| Cell subset             | Phenotype                                            | A, Non-infected  | B, Infected <2m post | C, Infected >5m post | p value              |                       |
|-------------------------|------------------------------------------------------|------------------|----------------------|----------------------|----------------------|-----------------------|
|                         |                                                      |                  |                      |                      | A vs. B <sup>i</sup> | B vs. C <sup>ii</sup> |
| Total B Cell            | CD19 <sup>+</sup> CD20 <sup>+</sup>                  | 9.6 (7.0-12.0)   | 6.0 (4.0-10.7)       | 6.4 (4.8-8.1)        | 0.08                 | 0.36                  |
| PB                      | CD38 <sup>hi</sup> CD27 <sup>+</sup>                 | 0.4 (0.2 - 0.7)  | 1.1 (0.4-1.6)        | 0.4 (0.2-0.9)        | 0.01                 | 0.04                  |
| Naïve                   | CD27 <sup>-</sup> IgD <sup>+</sup>                   | 55 (42.2-59.7)   | 34.9 (25.9-34.8)     | 30.2 (18.1-35.8)     | 0.0004               | 0.04                  |
| NSM                     | CD27 <sup>+</sup> IgD <sup>+</sup>                   | 11 (6.9-16.2)    | 12.1 (7.0-18.3)      | 9.7 (2.8-14.6)       | 0.27                 | 0.04                  |
| SM                      | CD27 <sup>+</sup> IgD <sup>-</sup>                   | 23.4 (21.3-29.3) | 36.2 (26.6-51.6)     | 35 (28.2-43.5)       | 0.006                | 0.25                  |
| SM IgM <sup>+</sup>     | CD27 <sup>+</sup> IgD <sup>-</sup> IgM <sup>+</sup>  | 14.9 (9.2-22.3)  | 32.7 (22.8-36.6)     | 10.1 (7.7-17.3)      | 0.001                | <0.0001               |
| SM IgG <sup>+</sup>     | CD27 <sup>+</sup> IgD <sup>-</sup> IgG <sup>+</sup>  | 6.7 (2.0-8.0)    | 4.3 (3.5-5.9)        | 7.7 (2.7-14.9)       | 0.21                 | 0.04                  |
| DNM                     | CD27 <sup>-</sup> IgD <sup>-</sup>                   | 7.9 (5.0-12.5)   | 10.4 (7.5-16.4)      | 21.3 (12.2-34.6)     | 0.08                 | 0.003                 |
| RBD <sup>+</sup> B Cell | CD19 <sup>+</sup> CD20 <sup>+</sup> RBD <sup>+</sup> | ND               | 1.13 (0.88-1.36)     | 1.03 (0.8-1.62)      | NA                   | 0.08                  |
| RBD <sup>+</sup> Naïve  | RBD <sup>+</sup> CD27 <sup>-</sup> IgD <sup>+</sup>  | ND               | 50.9 (40.6-68.7)     | 50 (43.3-62.0)       | NA                   | 0.30                  |
| RBD <sup>+</sup> NSM    | RBD <sup>+</sup> CD27 <sup>+</sup> IgD <sup>+</sup>  | ND               | 5.4 (3.3-14.3)       | 8.6 (5.3-14.2)       | NA                   | 0.4                   |
| RBD <sup>+</sup> SM     | RBD <sup>+</sup> CD27 <sup>+</sup> IgD <sup>-</sup>  | ND               | 27.1(14.1-39.3)      | 21.4 (13.2-35.6)     | NA                   | 0.42                  |
| RBD <sup>+</sup> DNM    | RBD <sup>+</sup> CD27 <sup>-</sup> IgD <sup>-</sup>  | ND               | 7.4 (4.4-11.1)       | 11.8 (6.5-18.2)      | NA                   | 0.01                  |

Data are presented as median and interquartile range (IQR); PB - Plasmablast; NSM - non switched memory; SM - switched memory; DNM - double-negative memory

<sup>i</sup>Comparison between non-infected and infected (<2 months) using Mann-Whitney U test

<sup>ii</sup>Comparison between infected (<2 months) and infected (>5 months) using Wilcoxon matched pairs test

ND, Non detected

NA, Not applicable

**Table S4. Comparison of cell subsets in pre- and post-vaccinations of non-infected and infected subjects**

| Cell subset             | Phenotype                                            | A, Infected, pre-vac | B, Infected, post-vac | C, Non-infected, pre-vac | D, Non-infected, post-vac | p value              |                       |
|-------------------------|------------------------------------------------------|----------------------|-----------------------|--------------------------|---------------------------|----------------------|-----------------------|
|                         |                                                      |                      |                       |                          |                           | A vs. B <sup>i</sup> | C vs. D <sup>ii</sup> |
| B Cell                  | CD19 <sup>+</sup> CD20 <sup>+</sup>                  | 5.1 (3.3-7.2)        | 3.5 (2.2 -4.7)        | 12.3 (11.5-16.7)         | 4.3 (3.2-4.8)             | 0.03                 | 0.004                 |
| RBD <sup>+</sup> B Cell | CD19 <sup>+</sup> CD20 <sup>+</sup> RBD <sup>+</sup> | 0.5 (0.3-0.8)        | 1.1 (0.9-1.6)         | ND                       | 0.8 (0.5-0.9)             | 0.003                | 0.004                 |
| PB                      | CD38 <sup>hi</sup> CD27 <sup>+</sup>                 | 0.6 (0.1-1.1)        | 0.4 (0-1.2)           | 0.4 (0.06-0.9)           | 0.2 (0.2-0.6)             | 0.31                 | 0.34                  |
| Naïve                   | CD27 <sup>-</sup> IgD <sup>+</sup>                   | 25.8 (12.5-37.1)     | 63.3 (5.4-71.7)       | 57.7 (49.1-63.6)         | 66.5 (64.1-73.9)          | 0.002                | 0.01                  |
| NSM                     | CD27 <sup>+</sup> IgD <sup>+</sup>                   | 5.7 (0.4-10.6)       | 3.5 (2.7-9.3)         | 9.7 (9.0-11.4)           | 5.4 (3.7-8.9)             | 0.42                 | 0.01                  |
| SM                      | CD27 <sup>+</sup> IgD <sup>-</sup>                   | 41.7 (25.1-49.7)     | 14.9 (12.5-17.7)      | 23.4 (20.2-30.6)         | 14.9 (12.5-17.7)          | 0.002                | 0.01                  |
| DNM                     | CD27 <sup>-</sup> IgD <sup>-</sup>                   | 19.2 (13.3-49.8)     | 14.7 (9.8-17.8)       | 9.9 (2.9-10.6)           | 9.8 (6.1-12.5)            | 0.007                | 0.27                  |

Data are presented as median and interquartile range (IQR); PB - Plasmablast; NSM - non switched memory; SM - switched memory;

DNM - double negative memory; vac - vaccination

Comparisons of infected pre- vs post-vaccination<sup>i</sup> and non-infected pre- vs post-vaccination<sup>ii</sup> using Wilcoxon matched pairs test
